# Supplementary material for: Simulated Ventilation of two Patients with a Single Ventilator in a Pandemic Setting
Source: Research Square preprint supplement (doi:10.21203/rs.3.rs-146213/v1), 2021-01-29
Supplement: Supplementary file 1 [file 1aca9c32f9ab2b507aa2db72.docx]

**Simulated Ventilation of two Patients with a Single Ventilator in a Pandemic Setting**

Pascal Schepat, M.D.,1 Benjamin Kober, M.D.,1 Martin Eble, M.D.,1 Volker Wenzel, M.D., M.Sc.,1 Holger Herff, M.D.2

1Department of Anesthesiology, Intensive Care Medicine, Pain Therapy and Emergency Medicine,Klinikum Friedrichshafen, Germany; Department of Anesthesiology,

2 Department of Anesthesiology, PAN Clinic, Cologne, Germany

Supplementary file legend (Video File) 1 and 2

Videos show the delayed filling of the test lung with the obstructed inspiratory circuit. Most probably ventilation was provided retrogradly through the expiratory circuit of the obstructed side that was directly connected to the expiratory circuit of the non obstructed side via Y-Adapter.
